# Supplementary material
Source: PubMed Central journal article supplement (PMC3449371)
Supplement: 97320630008678S1.pdf [file 97320630008678S1.pdf]

## Supplementary material:

**Table 1:** Possible Active Site

| Active site searched by literature | Active Site predicted by CASTp | Active Site predicted by PASS | Active Site predicted by Q-Site Finder |
|------------------------------------|--------------------------------|-------------------------------|----------------------------------------|
| ASP 67                             | ASP 67                         | ASP 67                        | ASP 67                                 |
| VAL 106                            | VAL 106                        | VAL 106                       | VAL 106                                |
| ASP 110                            | ASP 110                        | ASP 110                       | TYR 181                                |
| TYR 181                            | MET 184                        | TYR 181                       | ASP 110                                |
| MET 184                            | ASP 185                        | MET 184                       | MET 184                                |
| ASP 185                            | ASP 186                        | ASP 185                       | ASP 185                                |
| ASP 186                            | TRP 229                        | ASP 186                       | ASP 186                                |
| LEU 228                            |                                | LEU 228                       | LEU 228                                |
| TRP 229                            |                                | TRP 229                       | TRP 229                                |

**Table 2:** Characteristics of top seven ligand derivatives of 4-thiazolidinone identified from ChemBank database after virtual screening

| ChemBank ID | Molecular weight (g/mol) | Log P value | Energy Score (kcal/mol) with active site                                                                       | No. of Hydrogen Interaction of Ligand with Active site Residues | Rank of Molecule |
|-------------|--------------------------|-------------|----------------------------------------------------------------------------------------------------------------|-----------------------------------------------------------------|------------------|
| 3087795     | 254.32                   | 1.38        | -8.69 (VAL 106) -7.60 (ASP 186)<br>-7.60 (ASP 185)<br>-7.39 (MET 184)<br>-7.13 (TYR 181)<br>-6.34 (ASP 110)    | 6                                                               | 1                |
| 1656714     | 266.36                   | 3.003       | -7.34 (ASP 185)<br>-7.32 (ASP 186)<br>-7.30 (VAL 106)<br>-7.24 (MET 184)<br>-6.88 (TYR 181)<br>-6.34 (ASP 110) | 6                                                               | 5                |
| 1442532     | 288.34                   | 2.3         | -7.99 (MET 148)                                                                                                | 1                                                               | 2                |
| 1426866     | 266.0                    | 1.32        | -7.17 (ASP 185)                                                                                                | 1                                                               | 7                |
| 2061166     | 248.3                    | 1.31        | -7.43 (ASP 110)                                                                                                | 1                                                               | 4                |
| 1195053     | 264.34                   | 1.55        | -7.30 (ASP 185)                                                                                                | 1                                                               | 5                |
| 1187346     | 274.4                    | 2.23        | -7.60 (ASP 185)                                                                                                | 1                                                               | 3                |
